# Supplementary material
Source: PubMed Central journal article supplement (PMC1157028)

A

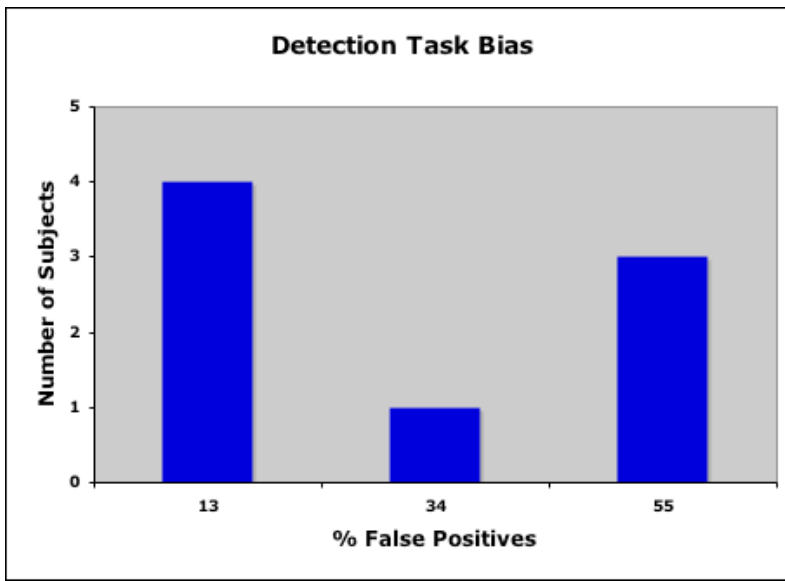

B

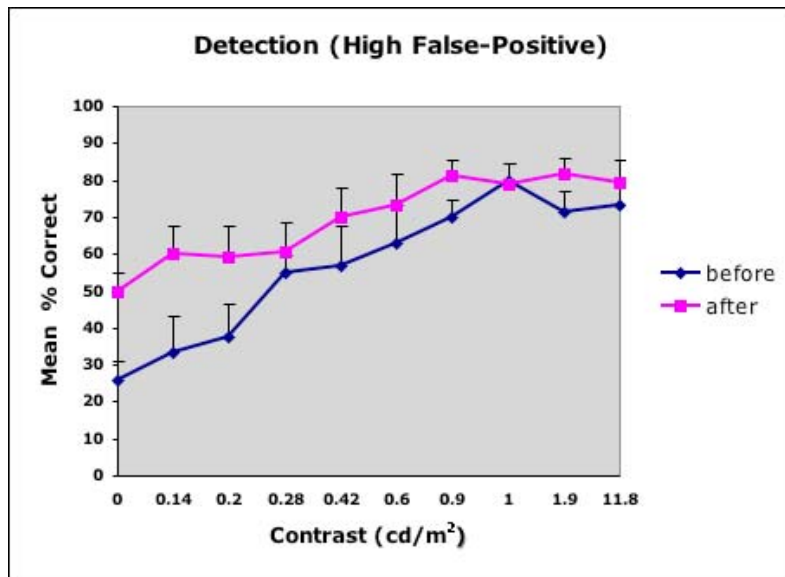

C

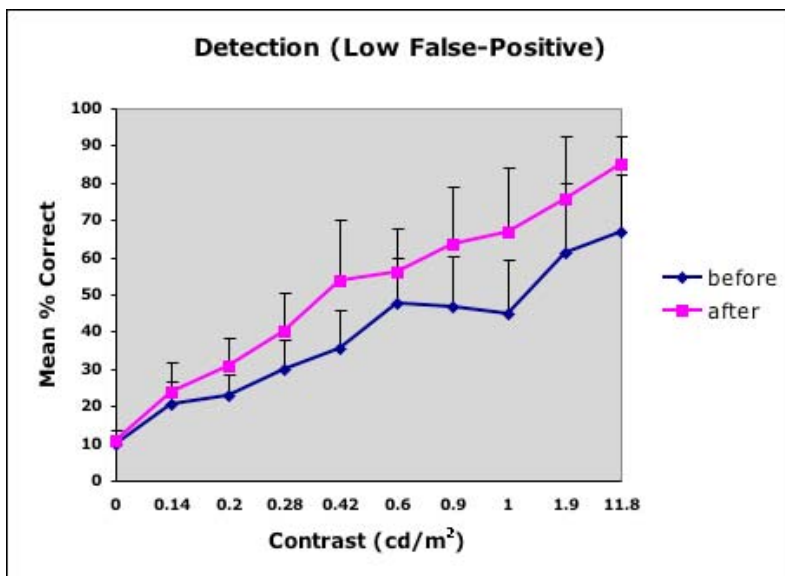

Supplement: pnas_0501026102_1.pdf [file pnas_0501026102_1.pdf]
